# Supplementary material for: Genome-wide identification and characterization of the Lateral Organ Boundaries Domain (LBD) gene family in polyploid wheat and related species
Source: PeerJ. 2021 Aug 11;9:e11811. doi: 10.7717/peerj.11811 (PMC8364319; doi:10.7717/peerj.11811)
Supplement: Supplemental Information 5 [file peerj-09-11811-s005.xlsx]

## Sheet: LBD Genes
Supplementary Table 2. Characteristics of LBD genes in eight species
species	Gene Name	Gene ID	Size（aa）	Predicted Subcellular location	chr	location
Triticum_aestivum	TraesCS1A02G062200	TaLBD1A-1	206	Nuclear	1A	42603254-42603901
	TraesCS1A02G111700	TaLBD1A-2	237	Nuclear	1A	112942474-112944362
	TraesCS1A02G222300	TaLBD1A-3	189	Nuclear	1A	391940836-391941644
	TraesCS1A02G260000	TaLBD1A-4	264	Nuclear	1A	453520442-453524428
	TraesCS1B02G080600	TaLBD1B-1	215	Nuclear	1B	63090600-63091536
	TraesCS1B02G131900	TaLBD1B-2	237	Nuclear	1B	165075989-165077836
	TraesCS1B02G235700	TaLBD1B-3	189	Nuclear	1B	422346110-422347138
	TraesCS1B02G270400	TaLBD1B-4	263	Nuclear	1B	475467101-475471177
	TraesCS1D02G110300	TaLBD1D-1	211	Nuclear	1D	104097628-104098372
	TraesCS1D02G113100	TaLBD1D-2	235	Nuclear	1D	109476630-109478560
	TraesCS1D02G224000	TaLBD1D-3	189	Nuclear	1D	311749592-311750588
	TraesCS1D02G259900	TaLBD1D-4	263	Nuclear	1D	353554598-353558695
	TraesCS2A02G194500	TaLBD2A-1	234	Nuclear	2A	163097513-163098955
	TraesCS2A02G271300	TaLBD2A-2	307	Nuclear	2A	443644759-443646174
	TraesCS2B02G212400	TaLBD2B-1	237	Nuclear	2B	196540502-196541707
	TraesCS2B02G289800	TaLBD2B-2	302	Nuclear	2B	401815261-401816564
	TraesCS2D02G008400	TaLBD2D-1	215	Nuclear	2D	138515533-138516869
	TraesCS2D02G270100	TaLBD2D-2	303	Nuclear	2D	333646422-333648041
	TraesCS3A02G093200	TaLBD3A-1	257	Nuclear	3A	59531321-59533219
	TraesCS3A02G170500	TaLBD3A-2	240	Nuclear	3A	178254443-178255643
	TraesCS3A02G205500	TaLBD3A-3	254	Nuclear	3A	361612609-361613373
	TraesCS3A02G295100	TaLBD3A-4	231	Nuclear	3A	529205494-529206501
	TraesCS3A02G346300	TaLBD3A-5	250	Nuclear	3A	595643968-595645484
	TraesCS3A02G402300	TaLBD3A-6	259	Nuclear	3A	647753474-647756192
	TraesCS3A02G492000	TaLBD3A-7	381	Nuclear	3A	719193894-719195240
	TraesCS3B02G106900	TaLBD3B-1	295	Nuclear	3B	72476888-72478263
	TraesCS3B02G108500	TaLBD3B-2	257	Nuclear	3B	74293323-74295396
	TraesCS3B02G196100	TaLBD3B-3	248	Nuclear	3B	222804235-222805387
	TraesCS3B02G378100	TaLBD3B-4	292	Nuclear	3B	596047454-596049013
	TraesCS3B02G435700	TaLBD3B-5	259	Nuclear	3B	674061243-674064169
	TraesCS3B02G553000	TaLBD3B-6	384	Nuclear	3B	787653855-787655310
	TraesCS3D02G091700	TaLBD3D-1	297	Nuclear	3D	46470645-46471994
	TraesCS3D02G093500	TaLBD3D-2	257	Nuclear	3D	47492467-47494713
	TraesCS3D02G308000	TaLBD3D-3	246	Nuclear	3D	421666515-421667642
	TraesCS3D02G340000	TaLBD3D-4	248	Nuclear	3D	453629269-453630785
	TraesCS3D02G397200	TaLBD3D-5	259	Nuclear	3D	511724301-511727491
	TraesCS3D02G498100	TaLBD3D-6	384	Nuclear	3D	589153761-589155120
	TraesCS4A02G067300	TaLBD4A-1	266	Nuclear	4A	64956484-64958633
	TraesCS4A02G107300	TaLBD4A-2	223	Nuclear	4A	123246762-123247725
	TraesCS4A02G235100	TaLBD4A-3	288	Nuclear	4A	544046632-544048552
	TraesCS4A02G236200	TaLBD4A-4	233	Nuclear	4A	544952753-544954937
	TraesCS4A02G297500	TaLBD4A-5	173	Nuclear	4A	596770453-596773779
	TraesCS4A02G312500	TaLBD4A-6	219	Nuclear	4A	603634586-603635579
	TraesCS4A02G415300	TaLBD4A-7	185	Nuclear	4A	685371901-685372824
	TraesCS4A02G415400	TaLBD4A-8	289	Nuclear	4A	685380302-685381598
	TraesCS4B02G001200	TaLBD4B-1	239	Nuclear	4B	804929-806039
	TraesCS4B02G016200	TaLBD4B-2	175	Nuclear	4B	11903666-11905863
	TraesCS4B02G078800	TaLBD4B-3	230	Nuclear	4B	75778121-75780025
	TraesCS4B02G079900	TaLBD4B-4	284	Nuclear	4B	77650052-77654072
	TraesCS4B02G197100	TaLBD4B-5	223	Nuclear	4B	424721434-424722601
	TraesCS4B02G224600	TaLBD4B-6	262	Nuclear	4B	470295844-470297889
	TraesCS4B02G316100	TaLBD4B-7	187	Nuclear	4B	605682776-605683517
	TraesCS4B02G316200	TaLBD4B-8	288	Nuclear	4B	605691920-605693239
	TraesCS4B02G346500	TaLBD4B-9	168	Nuclear	4B	640103317-640103895
	TraesCS4B02G361100	TaLBD4B-10	293	Nuclear	4B	650701185-650702364
	TraesCS4B02G361200	TaLBD4B-11	277	Nuclear	4B	650705820-650706975
	TraesCS4D02G001700	TaLBD4D-1	217	Nuclear	4D	1205779-1206821
	TraesCS4D02G014600	TaLBD4D-2	294	Nuclear	4D	6641807-6644017
	TraesCS4D02G077600	TaLBD4D-3	230	Nuclear	4D	51615420-51616874
	TraesCS4D02G078800	TaLBD4D-4	284	Nuclear	4D	52762678-52766546
	TraesCS4D02G197400	TaLBD4D-5	223	Nuclear	4D	342698606-342699718
	TraesCS4D02G225200	TaLBD4D-6	260	Nuclear	4D	382737797-382739949
	TraesCS4D02G312700	TaLBD4D-7	187	Nuclear	4D	478992187-478993066
	TraesCS4D02G312800	TaLBD4D-8	286	Nuclear	4D	478997945-478999338
	TraesCS4D02G341500	TaLBD4D-9	173	Nuclear	4D	498100287-498100908
	TraesCS4D02G354100	TaLBD4D-10	298	Nuclear	4D	504114728-504115931
	TraesCS4D02G354200	TaLBD4D-11	275	Nuclear	4D	504177198-504178305
	TraesCS5A02G152200	TaLBD5A-1	177	Nuclear	5A	329240412-329242107
	TraesCS5A02G191900	TaLBD5A-2	363	Nuclear	5A	395851340-395852914
	TraesCS5A02G284000	TaLBD5A-3	188	Nuclear	5A	491953316-491953968
	TraesCS5A02G515300	TaLBD5A-4	179	Nuclear	5A	678623663-678624509
	TraesCS5A02G529300	TaLBD5A-5	289	Nuclear	5A	688830909-688832077
	TraesCS5A02G529400	TaLBD5A-6	268	Nuclear	5A	688840283-688841089
	TraesCS5B02G150800	TaLBD5B-1	177	Nuclear	5B	278467544-278468588
	TraesCS5B02G191200	TaLBD5B-2	379	Nuclear	5B	344943726-344945141
	TraesCS5B02G282700	TaLBD5B-3	190	Nuclear	5B	467376793-467377451
	TraesCS5D02G157400	TaLBD5D-1	177	Nuclear	5D	245198452-245199603
	TraesCS5D02G199000	TaLBD5D-2	384	Nuclear	5D	301995033-301996626
	TraesCS5D02G291300	TaLBD5D-3	189	Nuclear	5D	389030291-389030946
	TraesCS6A02G053700	TaLBD6A-1	237	Nuclear	6A	27765272-27766350
	TraesCS6A02G398400	TaLBD6A-2	206	Nuclear	6A	609106630-609107673
	TraesCS6B02G072200	TaLBD6B-1	237	Nuclear	6B	48545163-48546141
	TraesCS6B02G438700	TaLBD6B-2	211	Nuclear	6B	704751222-704752255
	TraesCS6D02G382600	TaLBD6D-1	209	Nuclear	6D	462272054-462273163
	TraesCS7A02G228900	TaLBD7A-1	229	Nuclear	7A	199237344-199238903
	TraesCS7B02G195100	TaLBD7B-1	229	Nuclear	7B	335444534-335445928
	TraesCS7D02G229900	TaLBD7D-1	229	Nuclear	7D	190447108-190448500
	TraesCSU02G132900	TaLBDU-1	235	Nuclear	U	112254024
	TRIAE_CS42_3B_TGACv1_221342_AA0737920	TaLBD-3B	269	Nuclear	3B	128156-130000
	TRIAE_CS42_3DL_TGACv1_251481_AA0881870	TaLBD-3DL	232	Nuclear	3D	16216-19872
	TRIAE_CS42_3DS_TGACv1_273249_AA0929910	TaLBD-3DS	244	Nuclear	3D	21929-23075
	TRIAE_CS42_4AL_TGACv1_289193_AA0967050	TaLBD-4AL	176	Nuclear	4A	58697-62095
	TRIAE_CS42_U_TGACv1_640922_AA2079230	TaLBD-3A	290	Nuclear	3A	44676-45973
	TRIAE_CS42_4BL_TGACv1_322319_AA1070570	TaLBD-4BL	176	Nuclear	4B	946-1863
Hordeum_vulgare	HORVU0Hr1G017670	HvLBDU-1	210	Nuclear	U	92874309-92875556
	HORVU0Hr1G020290	HvLBDU-2	125	Nuclear	U	106732901-106733533
	HORVU1Hr1G012720	HvLBD1H-1	215	Nuclear	1H	32101798-32102986
	HORVU1Hr1G024490	HvLBD1H-2	166	Nuclear	1H	113482829-113484314
	HORVU1Hr1G060290	HvLBD1H-3	233	Nuclear	1H	438748890-438750009
	HORVU1Hr1G064640	HvLBD1H-4	278	Nuclear	1H	462585774-462589197
	HORVU2Hr1G035160	HvLBD2H-1	277	Nuclear	2H	146872451-146875863
	HORVU2Hr1G066080	HvLBD2H-2	302	Nuclear	2H	456865265-456868167
	HORVU3Hr1G016320	HvLBD3H-1	282	Nuclear	3H	39480612-39482097
	HORVU3Hr1G016690	HvLBD3H-2	277	Nuclear	3H	40939172-40942205
	HORVU3Hr1G033360	HvLBD3H-3	224	Nuclear	3H	174829790-174830461
	HORVU3Hr1G049860	HvLBD3H-4	307	Nuclear	3H	353864285-353865325
	HORVU3Hr1G075370	HvLBD3H-5	233	Nuclear	3H	563330965-563331752
	HORVU3Hr1G088440	HvLBD3H-6	330	Nuclear	3H	624909985-624911616
	HORVU3Hr1G090240	HvLBD3H-7	270	Nuclear	3H	631023234-631024125
	HORVU3Hr1G090250	HvLBD3H-8	259	Nuclear	3H	631065854-631068914
	HORVU3Hr1G109250	HvLBD3H-9	403	Nuclear	3H	677390850-677392449
	HORVU4Hr1G000880	HvLBD4H-1	225	Nuclear	4H	1331914-1333263
	HORVU4Hr1G002480	HvLBD4H-2	178	Nuclear	4H	4787099-4790132
	HORVU4Hr1G013380	HvLBD4H-3	228	Nuclear	4H	46568791-46570972
	HORVU4Hr1G013630	HvLBD4H-4	301	Nuclear	4H	48274598-48278702
	HORVU4Hr1G019230	HvLBD4H-5	245	Nuclear	4H	91547733-91592935
	HORVU4Hr1G056890	HvLBD4H-6	224	Nuclear	4H	478073955-478074720
	HORVU4Hr1G063160	HvLBD4H-7	256	Nuclear	4H	529392281-529394817
	HORVU4Hr1G080150	HvLBD4H-8	184	Nuclear	4H	614403440-614404576
	HORVU4Hr1G080160	HvLBD4H-9	284	Nuclear	4H	614410389-614411827
	HORVU4Hr1G084750	HvLBD4H-10	177	Nuclear	4H	629644074-629644737
	HORVU4Hr1G086700	HvLBD4H-11	300	Nuclear	4H	634903821-634904932
	HORVU5Hr1G047610	HvLBD5H-1	177	Nuclear	5H	370133789-370134854
	HORVU5Hr1G057690	HvLBD5H-2	357	Nuclear	5H	451916159-451917787
	HORVU7Hr1G046690	HvLBD7H-1	228	Nuclear	7H	153154346-153156168
Triticum_urartu	TuG1812G0100000785	TuLBD1A-1	187	Nuclear	1	44347858-44348469
	TuG1812G0100001262	TuLBD1A-2	237	Nuclear	1	105202180-105203840
	TuG1812G0100002612	TuLBD1A-3	189	Nuclear	1	387747949-387748960
	TuG1812G0100003006	TuLBD1A-4	249	Nuclear	1	453914712-453918888
	TuG1812G0200001969	TuLBD2A-1	234	Nuclear	2	145978971-145980348
	TuG1812G0200003217	TuLBD2A-2	307	Nuclear	2	459524988-459526215
	TuG1812G0300001019	TuLBD3A-1	288	Nuclear	3	52713432-52714429
	TuG1812G0300001042	TuLBD3A-2	257	Nuclear	3	54460625-54462615
	TuG1812G0300001934	TuLBD3A-3	240	Nuclear	3	181710046-181711103
	TuG1812G0300003543	TuLBD3A-4	203	Nuclear	3	548435120-548436011
	TuG1812G0300003858	TuLBD3A-5	250	Nuclear	3	587860405-587861918
	TuG1812G0300004366	TuLBD3A-6	259	Nuclear	3	637099821-637102886
	TuG1812G0300005619	TuLBD3A-7	136	Nuclear	3	729701449-729701962
	TuG1812G0400000082	TuLBD4A-1	136	Nuclear	4	4408338-4408927
	TuG1812G0400000759	TuLBD4A-2	288	Nuclear	4	60610114-60612656
	TuG1812G0400000773	TuLBD4A-3	233	Nuclear	4	61499971-61501937
	TuG1812G0400002406	TuLBD4A-4	173	Nuclear	4	467308498-467309137
	TuG1812G0400002679	TuLBD4A-5	264	Nuclear	4	509390967-509393001
	TuG1812G0400003451	TuLBD4A-6	185	Nuclear	4	586527083-586527784
	TuG1812G0400003452	TuLBD4A-7	245	Nuclear	4	586535670-586536592
	TuG1812G0500003192	TuLBD5A-1	175	Nuclear	5	471479182-471479810
	TuG1812G0500005314	TuLBD5A-2	136	Nuclear	5	635759297-635759810
	TuG1812G0500005366	TuLBD5A-3	289	Nuclear	5	640431606-640432737
	TuG1812G0500005367	TuLBD5A-4	273	Nuclear	5	640439554-640440620
	TuG1812G0600002304	TuLBD6A-1	189	Nuclear	6	320190751-320191762
	TuG1812G0700002435	TuLBD7A-1	227	Nuclear	7	198575545-198576963
	TuG1812S0002083700	TuLBDU-1	173	Nuclear	U	6150-9385
Aegilops_tauschii	AET1Gv20153400	AetLBD1D-1	215	Nuclear	1D	45528747-45529915
	AET1Gv20278600	AetLBD1D-2	246	Nuclear	1D	111946811-111948921
	AET1Gv20554200	AetLBD1D-3	189	Nuclear	1D	317319762-317320676
	AET1Gv20630100	AetLBD1D-4	263	Nuclear	1D	359108341-359112494
	AET1Gv20706400	AetLBD1D-5	92	Nuclear	1D	401888573-401889206
	AET2Gv20385300	AetLBD2D-1	236	Nuclear	2D	139789746-139792290
	AET3Gv20199900	AetLBD3D-1	297	Nuclear	3D	49549105-49551257
	AET3Gv20202400	AetLBD3D-2	257	Nuclear	3D	50594954-50596813
	AET3Gv20382100	AetLBD3D-3	215	Nuclear	3D	155338984-155339864
	AET3Gv20511100	AetLBD3D-4	266	Nuclear	3D	285388307-285389123
	AET3Gv20720500	AetLBD3D-5	246	Nuclear	3D	429216711-429218125
	AET3Gv20783000	AetLBD3D-6	248	Nuclear	3D	461170604-461172319
	AET3Gv20897300	AetLBD3D-7	259	Nuclear	3D	519977298-519980344
	AET3Gv21147300	AetLBD3D-8	379	Nuclear	3D	600582709-600583848
	AET4Gv20002800	AetLBD4D-1	226	Nuclear	4D	855597-856742
	AET4Gv20025400	AetLBD4D-2	203	Nuclear	4D	5652049-5654682
	AET4Gv20163900	AetLBD4D-3	230	Nuclear	4D	54480470-54482866
	AET4Gv20166100	AetLBD4D-4	291	Nuclear	4D	55611432-55614191
	AET4Gv20510100	AetLBD4D-5	213	Nuclear	4D	350586462-350587377
	AET4Gv20567200	AetLBD4D-6	219	Nuclear	4D	390874528-390876508
	AET4Gv20750700	AetLBD4D-7	187	Nuclear	4D	485403761-485405228
	AET4Gv20750800	AetLBD4D-8	286	Nuclear	4D	485409716-485411397
	AET4Gv20831300	AetLBD4D-9	325	Nuclear	4D	511820869-511822108
	AET5Gv20389900	AetLBD5D-1	177	Nuclear	5D	251762107-251763098
	AET6Gv20138600	AetLBD6D-1	235	Nuclear	6D	31445356-31446798
	AET6Gv20965900	AetLBD6D-2	188	Nuclear	6D	484618139-484619141
	AET7Gv20652000	AetLBD7D-1	101	Nuclear	7D	251185251-251186273
	AET4Gv20808800	AetLBD-4D	71	Nuclear	4D	505120389-505120724
	AET5Gv20661300	AetLBD-5D	87	Nuclear	5D	396147688-396147950
Triticum_dicoccoides	TRIDC1AG008490	TdLBD1A-1	234	Nuclear	1A	44505272-44505974
	TRIDC1AG014550	TdLBD1A-2	210	Nuclear	1A	109394545-109395931
	TRIDC1AG033580	TdLBD1A-3	189	Nuclear	1A	393706294-393707023
	TRIDC1AG038860	TdLBD1A-4	263	Nuclear	1A	455783115-455784015
	TRIDC1BG010590	TdLBD1B-1	203	Nuclear	1B	65530822-65531537
	TRIDC1BG019490	TdLBD1B-2	210	Nuclear	1B	159383943-159385399
	TRIDC1BG038950	TdLBD1B-3	189	Nuclear	1B	428623009-428623745
	TRIDC1BG044070	TdLBD1B-4	263	Nuclear	1B	480896555-480900529
	TRIDC2AG024960	TdLBD2A-1	234	Nuclear	2A	165460143-165461649
	TRIDC2AG039030	TdLBD2A-2	383	Nuclear	2A	440380987-440382391
	TRIDC2BG028050	TdLBD2B-1	197	Nuclear	2B	202200086-202200938
	TRIDC2BG042100	TdLBD2B-2	306	Nuclear	2B	403293369-403294728
	TRIDC3AG011010	TdLBD3A-1	208	Nuclear	3A	53908758-53909381
	TRIDC3AG011270	TdLBD3A-2	257	Nuclear	3A	55475500-55476273
	TRIDC3AG023400	TdLBD3A-3	223	Nuclear	3A	184036123-184036791
	TRIDC3AG030830	TdLBD3A-4	277	Nuclear	3A	371005962-371006989
	TRIDC3AG045310	TdLBD3A-5	235	Nuclear	3A	551849946-551850738
	TRIDC3AG057280	TdLBD3A-6	270	Nuclear	3A	643409450-643410342
	TRIDC3BG014870	TdLBD3B-1	210	Nuclear	3B	80832906-80833535
	TRIDC3BG015160	TdLBD3B-2	257	Nuclear	3B	82706462-82707235
	TRIDC3BG026720	TdLBD3B-3	225	Nuclear	3B	211007704-211008378
	TRIDC3BG051330	TdLBD3B-4	235	Nuclear	3B	561231485-561232268
	TRIDC3BG056180	TdLBD3B-5	251	Nuclear	3B	606575811-606576739
	TRIDC3BG064320	TdLBD3B-6	227	Nuclear	3B	684422429-684423323
	TRIDC4AG010910	TdLBD4A-1	253	Nuclear	4A	80898828-80900411
	TRIDC4AG014690	TdLBD4A-2	223	Nuclear	4A	122974242-122975016
	TRIDC4AG037060	TdLBD4A-3	216	Nuclear	4A	536365294-536365941
	TRIDC4AG037240	TdLBD4A-4	233	Nuclear	4A	537257523-537259398
	TRIDC4AG045640	TdLBD4A-5	200	Nuclear	4A	589413938-589417006
	TRIDC4AG047140	TdLBD4A-6	231	Nuclear	4A	595280296-595281266
	TRIDC4AG055210	TdLBD4A-7	245	Nuclear	4A	633020083-633020820
	TRIDC4AG055220	TdLBD4A-8	189	Nuclear	4A	633028825-633029432
	TRIDC4BG001610	TdLBD4B-1	230	Nuclear	4B	4693827-4694790
	TRIDC4BG002800	TdLBD4B-2	202	Nuclear	4B	11017712-11019415
	TRIDC4BG012220	TdLBD4B-3	230	Nuclear	4B	73127730-73129400
	TRIDC4BG012450	TdLBD4B-4	216	Nuclear	4B	74974426-74975073
	TRIDC4BG035480	TdLBD4B-5	223	Nuclear	4B	431093808-431094582
	TRIDC4BG039680	TdLBD4B-6	250	Nuclear	4B	476397995-476399536
	TRIDC4BG053380	TdLBD4B-7	191	Nuclear	4B	611668436-611669062
	TRIDC4BG053390	TdLBD4B-8	244	Nuclear	4B	611677826-611678560
	TRIDC5AG025380	TdLBD5A-1	177	Nuclear	5A	326789610-326790273
	TRIDC5AG073450	TdLBD5A-2	175	Nuclear	5A	671296841-671297510
	TRIDC5BG026550	TdLBD5B-1	171	Nuclear	5B	286487315-286487901
	TRIDC6AG006620	TdLBD6A-1	231	Nuclear	6A	27244640-27245634
	TRIDC6AG058590	TdLBD6A-2	207	Nuclear	6A	609201110-609201899
	TRIDC6BG009320	TdLBD6B-1	223	Nuclear	6B	46229683-46230710
	TRIDC6BG069150	TdLBD6B-2	207	Nuclear	6B	688578082-688578819
	TRIDC7AG029300	TdLBD7A-1	229	Nuclear	7A	197744169-197745855
	TRIDC7BG020220	TdLBD7B-1	229	Nuclear	7B	168385660-168387336
Brachypodium distachyon	PNT74440	Bd1-1	280	Nuclear	1	11,637,802-11,642,132
	KQK14217	Bd1-2	236	Nuclear	1	11,708,609-11,710,623
	KQK15457	Bd1-3	237	Nuclear	1	18,431,297-18,432,802
	KQK12827	Bd1-4	143	Nuclear	1	4,167,381-4,168,048
	KQK22193	Bd1-5	213	Nuclear	1	64,904,713-64,905,866
	KQK22581	Bd1-6	260	Nuclear	1	66,904,604-66,907,223
	KQK23638	Bd1-7	241	Nuclear	1	72,324,397-72,325,444
	KQK23639	Bd1-8	178	Nuclear	1	72,327,665-72,328,949
	KQK13888	Bd1-9	187	Nuclear	1	9,976,613-9,979,214
	KQK06240	Bd2-1	264	Nuclear	2	23,202,455-23,207,027
	KQK02883	Bd2-2	265	Nuclear	2	3,004,540-3,007,300
	KQK07317	Bd2-3	256	Nuclear	2	34,345,706-34,348,297
	KQK07840	Bd2-4	211	Nuclear	2	38,064,436-38,065,635
	KQK08349	Bd2-5	315	Nuclear	2	41,622,009-41,623,732
	PNT72943	Bd2-6	236	Nuclear	2	50,718,747-50,720,019
	KQK10377	Bd2-7	250	Nuclear	2	52,585,567-52,588,593
	KQK10976	Bd2-8	250	Nuclear	2	55,347,381-55,350,243
	KQK03543	Bd2-9	234	Nuclear	2	6,872,830-6,873,534
	KQJ94684	Bd3-1	214	Nuclear	3	11,253,654-11,255,382
	KQJ96334	Bd3-2	255	Nuclear	3	21,707,840-21,709,549
	KQJ98172	Bd3-3	404	Nuclear	3	37,322,305-37,323,519
	KQJ99034	Bd3-4	186	Nuclear	3	42,545,723-42,546,401
	KQK01414	Bd3-5	209	Nuclear	3	55,608,522-55,610,432
	KQJ88008	Bd4-1	190	Nuclear	4	15,566,779-15,568,325
	KQJ88280	Bd4-2	290	Nuclear	4	17,623,563-17,624,857
	KQJ88281	Bd4-3	300	Nuclear	4	17,627,823-17,629,040
	KQJ90000	Bd4-4	382	Nuclear	4	34,168,804-34,169,952
	PNT65593	Bd4-5	200	Nuclear	4	48,073,486-48,075,487
Oryza_indica	BGIOSGA038947-PA	OsLBD1-1	239	Nuclear	1	602-1416
	BGIOSGA001546-PA	OsLBD1-2	243	Nuclear	1	19946437-19947168
	BGIOSGA002703-PA	OsLBD1-3	308	Nuclear	1	2013999-2015014
	BGIOSGA001373-PA	OsLBD1-4	366	Nuclear	1	24262848-24264233
	BGIOSGA001371-PA	OsLBD1-5	148	Nuclear	1	24281531-24281977
	BGIOSGA001368-PA	OsLBD1-6	125	Nuclear	1	24295915-24296292
	BGIOSGA003804-PA	OsLBD1-7	251	Nuclear	1	24385381-24386136
	BGIOSGA003805-PA	OsLBD1-8	175	Nuclear	1	24388162-24388689
	BGIOSGA003810-PA	OsLBD1-9	130	Nuclear	1	24405887-24406279
	BGIOSGA000736-PA	OsLBD1-10	245	Nuclear	1	35887724-35888642
	BGIOSGA004719-PA	OsLBD1-11	251	Nuclear	1	38698742-38699874
	BGIOSGA002306-PA	OsLBD1-12	225	Nuclear	1	3998952-3999711
	BGIOSGA004955-PA	OsLBD1-13	269	Nuclear	1	42319604-42320518
	BGIOSGA000185-PA	OsLBD1-14	473	Nuclear	1	44827637-44835278
	BGIOSGA003124-PA	OsLBD1-15	249	Nuclear	1	8481399-8482771
	BGIOSGA005344-PA	OsLBD2-1	216	Nuclear	2	37421485-37422245
	BGIOSGA010952-PA	OsLBD3-1	236	Nuclear	3	10814330-10815135
	BGIOSGA010454-PA	OsLBD3-2	204	Nuclear	3	21375157-21375862
	BGIOSGA010258-PA	OsLBD3-3	234	Nuclear	3	26570303-26572379
	BGIOSGA013119-PA	OsLBD3-4	305	Nuclear	3	26745447-26746364
	BGIOSGA013249-PA	OsLBD3-5	214	Nuclear	3	29726404-29728449
	BGIOSGA011866-PA	OsLBD3-6	186	Nuclear	3	3170705-3171342
	BGIOSGA011445-PA	OsLBD3-7	259	Nuclear	3	3174320-3175183
	BGIOSGA013705-PA	OsLBD3-8	171	Nuclear	3	37107458-37108823
	BGIOSGA011118-PA	OsLBD3-9	276	Nuclear	3	8281040-8282749
	BGIOSGA018245-PA	OsLBD5-1	200	Nuclear	5	17143138-17143835
	BGIOSGA018244-PA	OsLBD5-2	200	Nuclear	5	17145156-17145853
	BGIOSGA018046-PA	OsLBD5-3	280	Nuclear	5	21609216-21610160
	BGIOSGA018747-PA	OsLBD5-4	208	Nuclear	5	4033118-4034829
	BGIOSGA026049-PA	OsLBD7-1	226	Nuclear	7	22096813-22097583
	BGIOSGA028630-PA	OsLBD8-1	453	Nuclear	8	20375334-20376695
	BGIOSGA029005-PA	OsLBD8-2	279	Nuclear	8	27388850-27391238
	BGIOSGA026473-PA	OsLBD8-3	215	Nuclear	8	30142283-30143322
	BGIOSGA030605-PA	OsLBD9-1	366	Nuclear	9	10346195-10347295
	BGIOSGA032254-PA	OsLBD10-1	269	Nuclear	10	3717144-3718778
	BGIOSGA034653-PA	OsLBD11-1	156	Nuclear	11	48318-48788
	BGIOSGA036857-PA	OsLBD12-1	158	Nuclear	12	518851-519327
Arabidopsis	AtLBD2	AT1G06280	206	Nuclear	1	1920307-1920949
	AtLBD1	AT1G07900	190	Nuclear	1	2442570-2443746
	AtLBD3	AT1G16530	165	Nuclear	1	5651268-5652883
	AtLBD4	AT1G31320	172	Nuclear	1	11212958-11214567
	AtLBD5	AT1G36000	122	Nuclear	1	13422554-13423028
	AtAS2	AT1G65620	199	Nuclear	1	24398156-24400989
	AtLBD40	AT1G67100	233	Nuclear	1	25053673-25054864
	AtLBD42	AT1G68510	233	Nuclear	1	25706882-25708503
	AtLBD7	AT1G72980	214	Nuclear	1	27456043-27456949
	AtLBD8	AT2G19510	120	Nuclear	2	8453200-8453713
	AtLBD9	AT2G19820	124	Nuclear	2	8553543-8554040
	AtLBD10	AT2G23660	311	Nuclear	2	10060065-10061822
	AtLBD11	AT2G28500	232	Nuclear	2	12186274-12188293
	PCK1	AT2G30130	193	Nuclear	2	12868461-12870045
	AtLBD13	AT2G30340	268	Nuclear	2	12931172-12932828
	AtLBD14	AT2G31310	188	Nuclear	2	13352917-13353672
	AtLBD15	AT2G40470	224	Nuclear	2	16902038-16904032
	AtLBD16	AT2G42430	245	Nuclear	2	17663353-17665337
	AtLBD17	AT2G42440	244	Nuclear	2	17668701-17669836
	AtLBD19	AT2G45410	191	Nuclear	2	18712220-18713211
	AtLBD18	AT2G45420	262	Nuclear	2	18718348-18720729
	AtLBD41	AT3G02550	263	Nuclear	3	536500-538126
	AtLBD20	AT3G03760	273	Nuclear	3	943557-944834
	AtLBD21	AT3G11090	165	Nuclear	3	3474922-3475848
	AtLBD22	AT3G13850	268	Nuclear	3	4559619-4561020
	AtLBD23	AT3G26620	121	Nuclear	3	9790628-9791117
	AtLBD24	AT3G26660	121	Nuclear	3	9797129-9797620
	AtLBD25	AT3G27650	159	Nuclear	3	10238514-10240648
	AtLBD26	AT3G27940	153	Nuclear	3	10373251-10376461
	AtLBD27	AT3G47870	328	Nuclear	3	17659680-17661354
	AtLBD38	AT3G49940	247	Nuclear	3	18514266-18516131
	AtLBD28	AT3G50510	198	Nuclear	3	18744887-18746045
	AtLBD29	AT3G58190	218	Nuclear	3	21548484-21549572
	AtLBD31	AT4G00210	220	Nuclear	4	85471-87071
	AtLBD30	AT4G00220	228	Nuclear	4	89908-92255
	AtLBD32	AT4G22700	192	Nuclear	4	11933297-11933886
	AtLBD39	AT4G37540	240	Nuclear	4	17639393-17640925
	AtLBD33	AT5G06080	177	Nuclear	5	1830671-1831467
	AtLBD34	AT5G15060	141	Nuclear	5	4874332-4875949
	AtLBD35	AT5G35900	206	Nuclear	5	14028682-14029426
	AtLOB	AT5G63090	186	Nuclear	5	25308516-25310973
	AtLBD36	AT5G66870	313	Nuclear	5	26705785-26708741
	AtLBD37	AT5G67420	250	Nuclear	5	26903990-26906517
