# Supplementary material for: Genome-wide identification and characterization of the Lateral Organ Boundaries Domain (LBD) gene family in polyploid wheat and related species
Source: PeerJ. 2021 Aug 11;9:e11811. doi: 10.7717/peerj.11811 (PMC8364319; doi:10.7717/peerj.11811)
Supplement: Supplemental Information 6 [file peerj-09-11811-s006.xlsx]

## Sheet: Raw data
Sample Name	Target Name	CT
Bgt 0 h	TaTubulin	19.7281
Bgt 0 h	TaTubulin	19.8973
Bgt 0 h	TaTubulin	19.9931
Bgt 12 h	TaTubulin	22.5758
Bgt 12 h	TaTubulin	23.7363
Bgt 12 h	TaTubulin	23.3872
Bgt 24 h	TaTubulin	24.9895
Bgt 24 h	TaTubulin	25.0359
Bgt 24 h	TaTubulin	25.1248
Bgt 36 h	TaTubulin	23.1667
Bgt 36 h	TaTubulin	23.1227
Bgt 36 h	TaTubulin	23.1356
Bgt 0 h	TaLBD2A-1	21.367
Bgt 0 h	TaLBD2A-1	21.7985
Bgt 0 h	TaLBD2A-1	21.8427
Bgt 12 h	TaLBD2A-1	25.9645
Bgt 12 h	TaLBD2A-1	27.0677
Bgt 12 h	TaLBD2A-1	26.3232
Bgt 24 h	TaLBD2A-1	27.8243
Bgt 24 h	TaLBD2A-1	28.0204
Bgt 24 h	TaLBD2A-1	29.403
Bgt 36 h	TaLBD2A-1	26.2357
Bgt 36 h	TaLBD2A-1	25.6299
Bgt 36 h	TaLBD2A-1	25.9665
Bgt 0 h	TaLBD2A-2	19.2329
Bgt 0 h	TaLBD2A-2	19.3125
Bgt 0 h	TaLBD2A-2	19.3425
Bgt 12 h	TaLBD2A-2	22.4738
Bgt 12 h	TaLBD2A-2	21.8326
Bgt 12 h	TaLBD2A-2	22.2331
Bgt 24 h	TaLBD2A-2	24.2124
Bgt 24 h	TaLBD2A-2	24.5889
Bgt 24 h	TaLBD2A-2	24.5985
Bgt 36 h	TaLBD2A-2	22.4794
Bgt 36 h	TaLBD2A-2	22.2373
Bgt 36 h	TaLBD2A-2	22.3854
Bgt 0 h	TaLBD3B-1	19.9817
Bgt 0 h	TaLBD3B-1	19.9054
Bgt 0 h	TaLBD3B-1	19.8204
Bgt 12 h	TaLBD3B-1	22.8674
Bgt 12 h	TaLBD3B-1	23.9766
Bgt 12 h	TaLBD3B-1	23.6227
Bgt 24 h	TaLBD3B-1	24.2818
Bgt 24 h	TaLBD3B-1	25.0776
Bgt 24 h	TaLBD3B-1	24.6775
Bgt 36 h	TaLBD3B-1	22.9641
Bgt 36 h	TaLBD3B-1	22.7883
Bgt 36 h	TaLBD3B-1	22.9126
Bgt 0 h	TaLBD4A-4	19.1052
Bgt 0 h	TaLBD4A-4	19.6096
Bgt 0 h	TaLBD4A-4	20.7545
Bgt 12 h	TaLBD4A-4	22.2054
Bgt 12 h	TaLBD4A-4	23.7363
Bgt 12 h	TaLBD4A-4	22.3506
Bgt 24 h	TaLBD4A-4	23.7194
Bgt 24 h	TaLBD4A-4	24.3262
Bgt 24 h	TaLBD4A-4	24.0909
Bgt 36 h	TaLBD4A-4	22.5976
Bgt 36 h	TaLBD4A-4	22.3113
Bgt 36 h	TaLBD4A-4	22.1144
root	TaTubulin	18.1122
root	TaTubulin	17.1314
root	TaTubulin	17.7814
stem	TaTubulin	16.7617
stem	TaTubulin	16.3296
stem	TaTubulin	15.7313
leaf	TaTubulin	19.2509
leaf	TaTubulin	19.8661
leaf	TaTubulin	19.9799
Embryo sac	TaTubulin	24.8911
Embryo sac	TaTubulin	22.5362
Embryo sac	TaTubulin	23.7511
Lodicule	TaTubulin	23.2406
Lodicule	TaTubulin	22.6732
Lodicule	TaTubulin	21.1403
Lemma and Glumelle	TaTubulin	26.624
Lemma and Glumelle	TaTubulin	25.3727
Lemma and Glumelle	TaTubulin	25.5964
Glume	TaTubulin	22.3116
Glume	TaTubulin	22.0743
Glume	TaTubulin	22.1925
root	TaLBD2A-1	25.2893
root	TaLBD2A-1	24.734
root	TaLBD2A-1	24.9471
stem	TaLBD2A-1	26.8159
stem	TaLBD2A-1	26.6341
stem	TaLBD2A-1	26.4711
leaf	TaLBD2A-1	27.0769
leaf	TaLBD2A-1	27.2869
leaf	TaLBD2A-1	27.7701
Embryo sac	TaLBD2A-1	29.0831
Embryo sac	TaLBD2A-1	28.4569
Embryo sac	TaLBD2A-1	28.1706
Lodicule	TaLBD2A-1	27.7926
Lodicule	TaLBD2A-1	27.8931
Lodicule	TaLBD2A-1	28.66
Lemma and Glumelle	TaLBD2A-1	27.6275
Lemma and Glumelle	TaLBD2A-1	29.249
Lemma and Glumelle	TaLBD2A-1	29.5318
Glume	TaLBD2A-1	24.2829
Glume	TaLBD2A-1	25.0964
Glume	TaLBD2A-1	25.2803
root	TaLBD2A-2	23.1453
root	TaLBD2A-2	22.478
root	TaLBD2A-2	23.0622
stem	TaLBD2A-2	23.6872
stem	TaLBD2A-2	23.6579
stem	TaLBD2A-2	23.9672
leaf	TaLBD2A-2	25.2393
leaf	TaLBD2A-2	26.0149
leaf	TaLBD2A-2	26.2025
Embryo sac	TaLBD2A-2	27.721
Embryo sac	TaLBD2A-2	25.5739
Embryo sac	TaLBD2A-2	26.6158
Lodicule	TaLBD2A-2	29.3137
Lodicule	TaLBD2A-2	29.3327
Lodicule	TaLBD2A-2	28.361
Lemma and Glumelle	TaLBD2A-2	31.6659
Lemma and Glumelle	TaLBD2A-2	29.9465
Lemma and Glumelle	TaLBD2A-2	30.3396
Glume	TaLBD2A-2	27.9355
Glume	TaLBD2A-2	27.4218
Glume	TaLBD2A-2	27.5191
root	TaLBD3B-1	26.8509
root	TaLBD3B-1	27.3842
root	TaLBD3B-1	27.5786
stem	TaLBD3B-1	29.8902
stem	TaLBD3B-1	28.9723
stem	TaLBD3B-1	27.5676
leaf	TaLBD3B-1	30.293
leaf	TaLBD3B-1	30.8724
leaf	TaLBD3B-1	30.1668
Embryo sac	TaLBD3B-1	29.0676
Embryo sac	TaLBD3B-1	29.6437
Embryo sac	TaLBD3B-1	29.4804
Lodicule	TaLBD3B-1	33.993
Lodicule	TaLBD3B-1	33.7032
Lodicule	TaLBD3B-1	34.8325
Lemma and Glumelle	TaLBD3B-1	33.4665
Lemma and Glumelle	TaLBD3B-1	29.3506
Lemma and Glumelle	TaLBD3B-1	32.8413
Glume	TaLBD3B-1	31.6785
Glume	TaLBD3B-1	31.5305
Glume	TaLBD3B-1	31.9741
root	TaLBD4A-4	23.6548
root	TaLBD4A-4	22.3008
root	TaLBD4A-4	23.1706
stem	TaLBD4A-4	30.1082
stem	TaLBD4A-4	28.0449
stem	TaLBD4A-4	27.0188
leaf	TaLBD4A-4	25.9195
leaf	TaLBD4A-4	30.049
leaf	TaLBD4A-4	26.4381
Embryo sac	TaLBD4A-4	35.2272
Embryo sac	TaLBD4A-4	32.2566
Embryo sac	TaLBD4A-4	35.3838
Lodicule	TaLBD4A-4	33.2524
Lodicule	TaLBD4A-4	31.9602
Lodicule	TaLBD4A-4	31.0102
Lemma and Glumelle	TaLBD4A-4	31.3536
Lemma and Glumelle	TaLBD4A-4	32.7676
Lemma and Glumelle	TaLBD4A-4	32.8249
Glume	TaLBD4A-4	30.8792
Glume	TaLBD4A-4	29.4697
Glume	TaLBD4A-4	29.0437
