# Supplementary material for: Genome-wide identification and characterization of the Lateral Organ Boundaries Domain (LBD) gene family in polyploid wheat and related species
Source: PeerJ. 2021 Aug 11;9:e11811. doi: 10.7717/peerj.11811 (PMC8364319; doi:10.7717/peerj.11811)
Supplement: Supplemental Information 7 [file peerj-09-11811-s007.xlsx]

## Sheet: Raw data
Sample Name	Target Name	CT
NaCl 12h	TaTubulin	20.5081
NaCl 12h	TaTubulin	20.5365
NaCl 12h	TaTubulin	21.5803
NaCl 24h	TaTubulin	21.8646
NaCl 24h	TaTubulin	21.7327
NaCl 24h	TaTubulin	20.7854
NaCl 12h	TaLBD2A-2	27.2991
NaCl 12h	TaLBD2A-2	26.9307
NaCl 12h	TaLBD2A-2	27.5719
NaCl 24h	TaLBD2A-2	24.1906
NaCl 24h	TaLBD2A-2	24.1151
NaCl 24h	TaLBD2A-2	24.4253
NaCl 12h	TaLBD3B-1	33.0821
NaCl 12h	TaLBD3B-1	33.33
NaCl 12h	TaLBD3B-1	32.3329
NaCl 24h	TaLBD3B-1	29.9373
NaCl 24h	TaLBD3B-1	30.1735
NaCl 24h	TaLBD3B-1	31.7561
